# Supplementary material for: l-Lysine derived fabrication of Cu@Ni core–satellite nanoassemblies as efficient non-Pt catalysts for the methanol oxidation reaction
Source: Royal Society of Chemistry journal article supplement (doi:10.1039/d2ce00963c), 2022-01-01
Supplement: d2ce00963c1.pdf [file d2ce00963c1.pdf]

**L-Lysine derived fabrication of Cu@Ni core-satellite nanoassemblies as efficient non-Pt catalysts for methanol oxidation reaction**

*Anzhou Yang<sup>a,b</sup>, Qiuzi Huang<sup>b</sup>, Ziqi Wei<sup>b</sup>, Zehan Yu<sup>b</sup>, Meifeng Cui<sup>b</sup>, Wu Lei<sup>a,\*</sup>, Yawen Tang<sup>b,\*</sup>, and Xiaoyu Qiu<sup>b,\*</sup>*

<sup>a</sup> School of Chemical Engineering, Nanjing University of Science and Technology, Nanjing 210094, P. R. China

<sup>b</sup> Jiangsu Key Laboratory of New Power Batteries, Jiangsu Collaborative Innovation Center of Biomedical Functional Materials, School of Chemistry and Materials Science, Nanjing Normal University, Nanjing 210023, P. R. China

\* Correspondence author:

E-mail: [leiwuhao@njtu.edu.cn](mailto:leiwuhao@njtu.edu.cn) (W. Lei).

[tangyawen@njnu.edu.cn](mailto:tangyawen@njnu.edu.cn) (Y. Tang).

[07255@njnu.edu.cn](mailto:07255@njnu.edu.cn) (X. Qiu).

## Figures

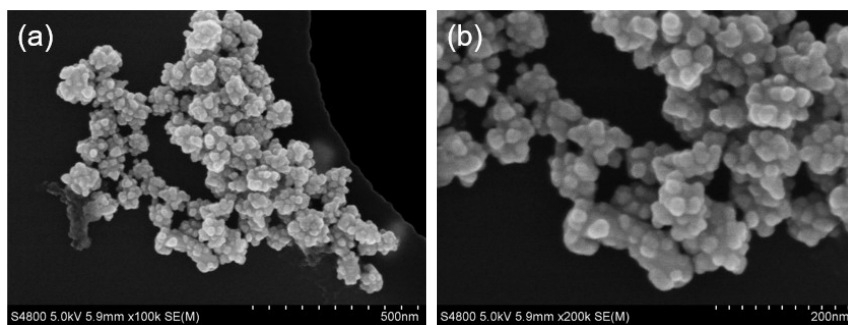

**Figure S1.** SEM images of Cu@Ni CS-NAs.

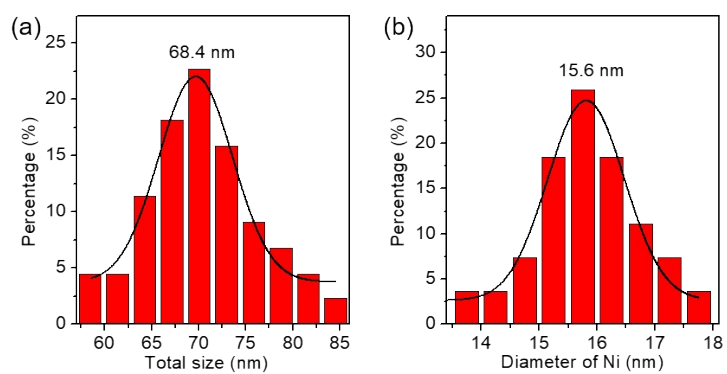

**Figure S2.** Particle size distribution diagram of (a) total size and (b) surface satellites

for Cu@Ni CS-NAs.

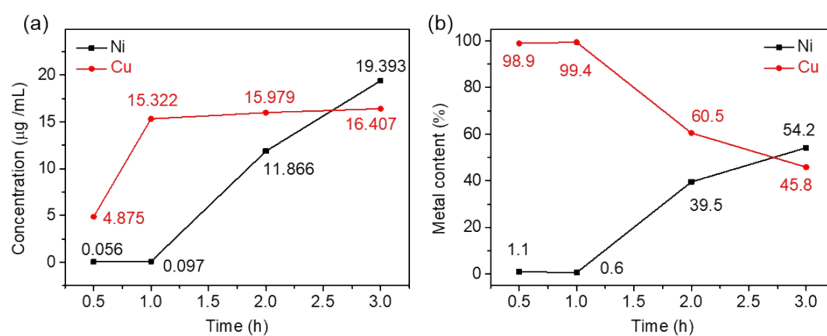

**Figure S3.** (a) ICP-MS analysis of the products reacted for 0.5 h, 1 h, 2 h, and 3 h, respectively. The as-collected products were dissolved in 20 mL aqua regia and then diluted by deionized water with ratio of 1:6. (b) Metal content analysis.

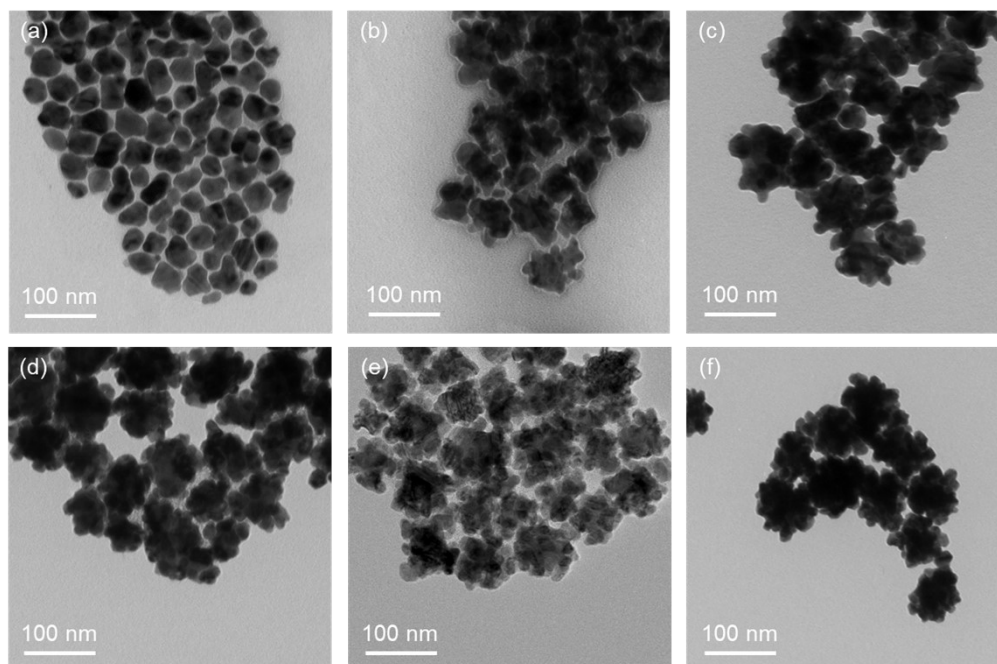

**Figure S4.** Representative TEM images of products using different dosage of L-lysine.

(a) 0 mg, (b) 10 mg, (c) 20 mg, (d) 30 mg, (e) 40 mg, and (f) 50 mg L-lysine.

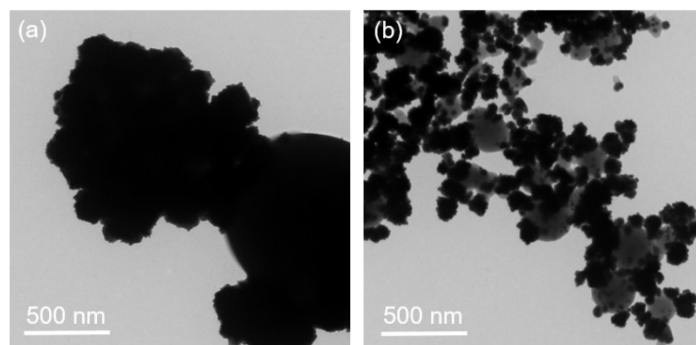

**Figure S5.** TEM images of the products prepared in the absence of (a) TEG and (b) OAm, respectively.

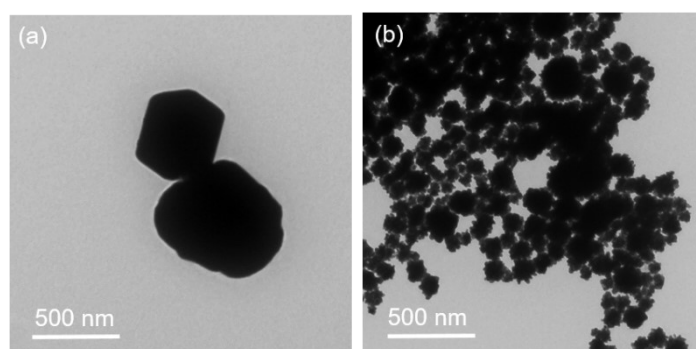

**Figure S6.** TEM images of (a) pure Cu nanopolyhedrons, and (b) pure Ni nanoparticles.

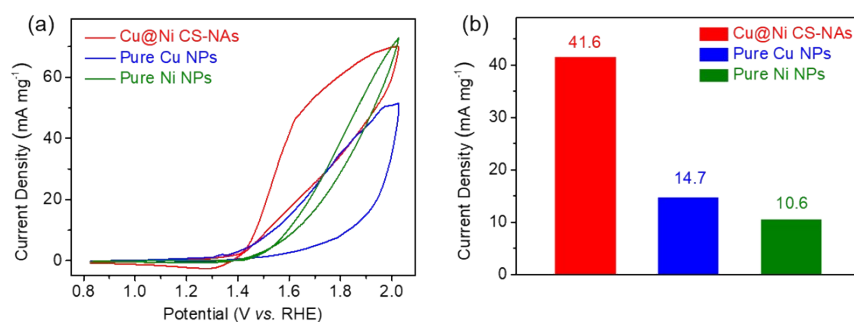

**Figure S7.** (a) CV curves of the catalysts in 1.0 M KOH + 0.5 M  $\text{CH}_3\text{OH}$  solution at a scan rate of  $50 \text{ mV s}^{-1}$ . (b) Contrast histogram of mass activity at 1.6 V

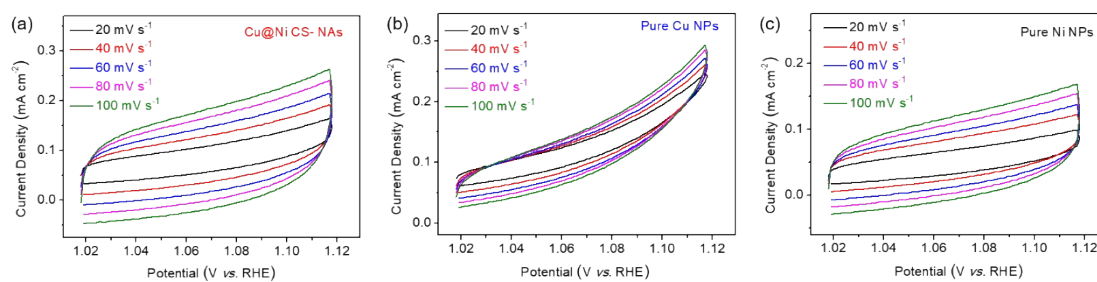

**Figure S8.** CV curves in the double layer region at different scan rates for (a) Cu@Ni CS-NAs, (b) pure Cu NPs and (c) pure Ni NPs.

**Table S1** Comparison of the MOR performance of Cu@Ni CS-NAs with previously reported efficient catalysts in alkaline medium.

| Number | Catalyst                                                   | Specific activity (mA cm <sup>-2</sup> ) | Applied potential | Electrolyte                           | Ref                                                                |
|--------|------------------------------------------------------------|------------------------------------------|-------------------|---------------------------------------|--------------------------------------------------------------------|
| 1      | Cu@Ni CS-NAs                                               | 29.6                                     | 1.60 V @RHE       | 1.0 M KOH + 0.5 M CH <sub>3</sub> OH  | This work                                                          |
| 2      | Ni-beta-SDS/GC                                             | 21                                       | 0.77 V @Hg/HgO    | 0.1 M NaOH + 0.1 M CH <sub>3</sub> OH | <i>J. Mater. Chem. A</i> , <b>2015</b> , 3, 5811-5814              |
| 3      | NiO/Ni@CNTs                                                | 4.5                                      | 0.58 V @Hg/HgO    | 1.0 M KOH + 1.0 M CH <sub>3</sub> OH  | <i>J. Mater. Chem. A</i> , <b>2017</b> , 5, 9946-9951              |
| 4      | Ni <sub>2</sub> Sn <sub>1</sub>                            | 10.8                                     | 0.49 V @Hg/HgO    | 0.5 M KOH + 0.5 M CH <sub>3</sub> OH  | <i>Appl. Catal. B: Environ.</i> <b>2018</b> , 234, 10-18           |
| 5      | Urchin-like Ni <sub>1</sub> Co <sub>2</sub> O <sub>4</sub> | 13.5                                     | 0.6 V @Ag/AgCl    | 0.1 M KOH + 0.5 M CH <sub>3</sub> OH  | <i>Nanoscale</i> , <b>2014</b> , 6, 9665-9672                      |
| 6      | Ni <sub>60</sub> Nb <sub>40</sub> nanoglass                | 9.3                                      | 0.8 V @Ag/AgCl    | 0.1 M NaOH + 4.0 M CH <sub>3</sub> OH | <i>ACS Appl. Nano Mater.</i> <b>2020</b> , 3, 7252-7259            |
| 7      | La <sub>1.4</sub> Sr <sub>0.6</sub> NiO <sub>4+δ</sub>     | 3.34                                     | 1.59 V @RHE       | 0.5 M NaOH + 1.5 M CH <sub>3</sub> OH | <i>ACS Appl. Energy Mater.</i> <b>2022</b> , 5, 503-515            |
| 8      | CuS                                                        | 7.7                                      | 0.7 V @Ag/AgCl    | 0.1 M NaOH + 0.5 M CH <sub>3</sub> OH | <i>J. Mater. Chem. A</i> , <b>2016</b> , 4, 12253-12262            |
| 9      | NiCo <sub>2</sub> O <sub>4</sub> -rGO                      | 16.6                                     | 1.66 V @SHE       | 1.0 M KOH + 0.5 M CH <sub>3</sub> OH  | <i>Electrochim. Acta</i> , <b>2016</b> , 213, 717-729              |
| 10     | Ni-MOF/Ni(OH) <sub>2</sub> heterocomposite                 | 24.6                                     | 0.85 V @Hg/HgO    | 0.1 M KOH + 1.0 M CH <sub>3</sub> OH  | <i>ACS Appl. Mater. Interfaces</i> , <b>2021</b> , 13, 26472-26481 |
| 11     | Mn doped Ni(OH) <sub>2</sub>                               | 16.7                                     | 1.55 V @RHE       | 1.0 M KOH + 0.5 M CH <sub>3</sub> OH  | <i>Nano Energy</i> , <b>2019</b> , 55, 37-41                       |
